# Supplementary material for: Autophagy induction causes a synthetic lethal sensitization to ribonucleotide reductase inhibition in breast cancer cells
Source: PubMed Central journal article supplement (PMC4811511; doi:10.18632/oncotarget.6539), 2015-12-09
Supplement: oncotarget-07-1984-s001.pdf [file oncotarget-07-1984-s001.pdf]

# Autophagy induction causes a synthetic lethal sensitization to ribonucleotide reductase inhibition in breast cancer cells

## Supplementary Material

**A**

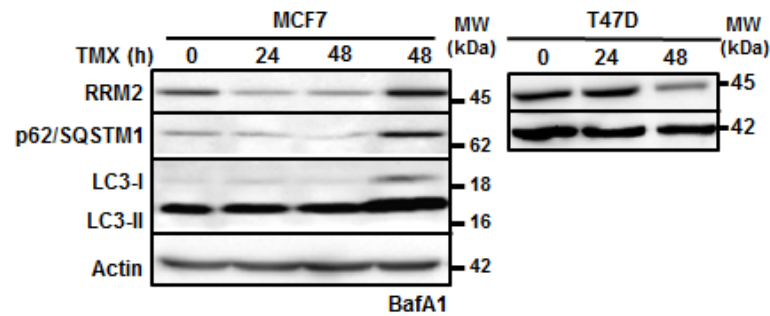

**B**

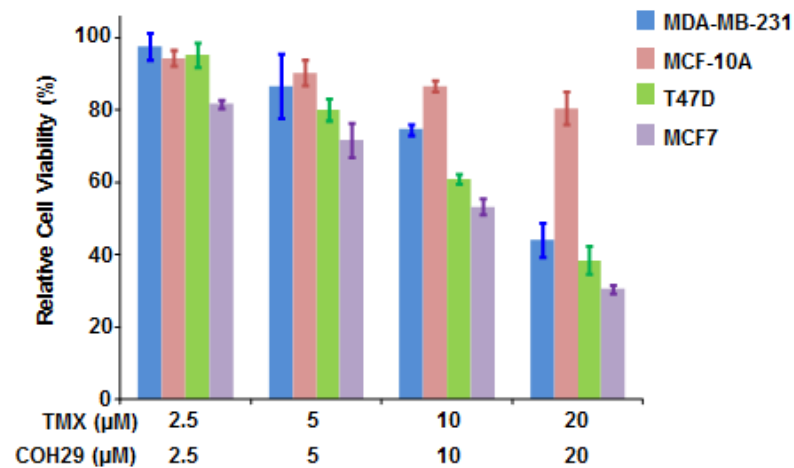

**C**

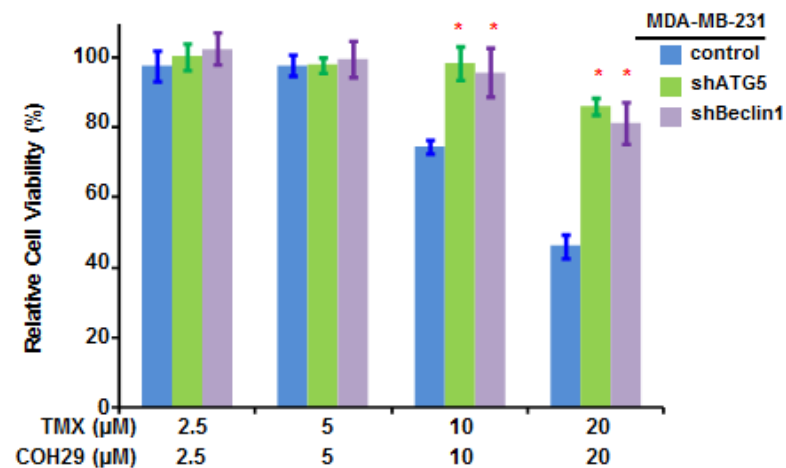

**Supplementary Figure S1: (A)** TMX decreases RRM2 expression and induces autophagy in

MCF7 and T47D breast cancer cells. **(B)** MCF-10A cells are resistant to the combination of TMX and COH29. Relative cell viability in the MDA-MB-231, T47D MCF7, and MCF-10A cells treated with the combination of TMX and COH29 is shown. No treatment controls are defined as 100% viable. Results are shown as means  $\pm$  SD; n = 3. **(C)** ATG5 or BECLIN1 is indispensable for the cytotoxicity of the combination of TMX and COH29. Relative cell viability in MDA-MB-231, MDA-MB-231/shATG5, and MDA-MB-231/shBECLIN1 cells treated with the combination of TMX and COH29 is shown. No treatment controls are defined as 100% viable. Results are shown as means  $\pm$  SD; n = 3.

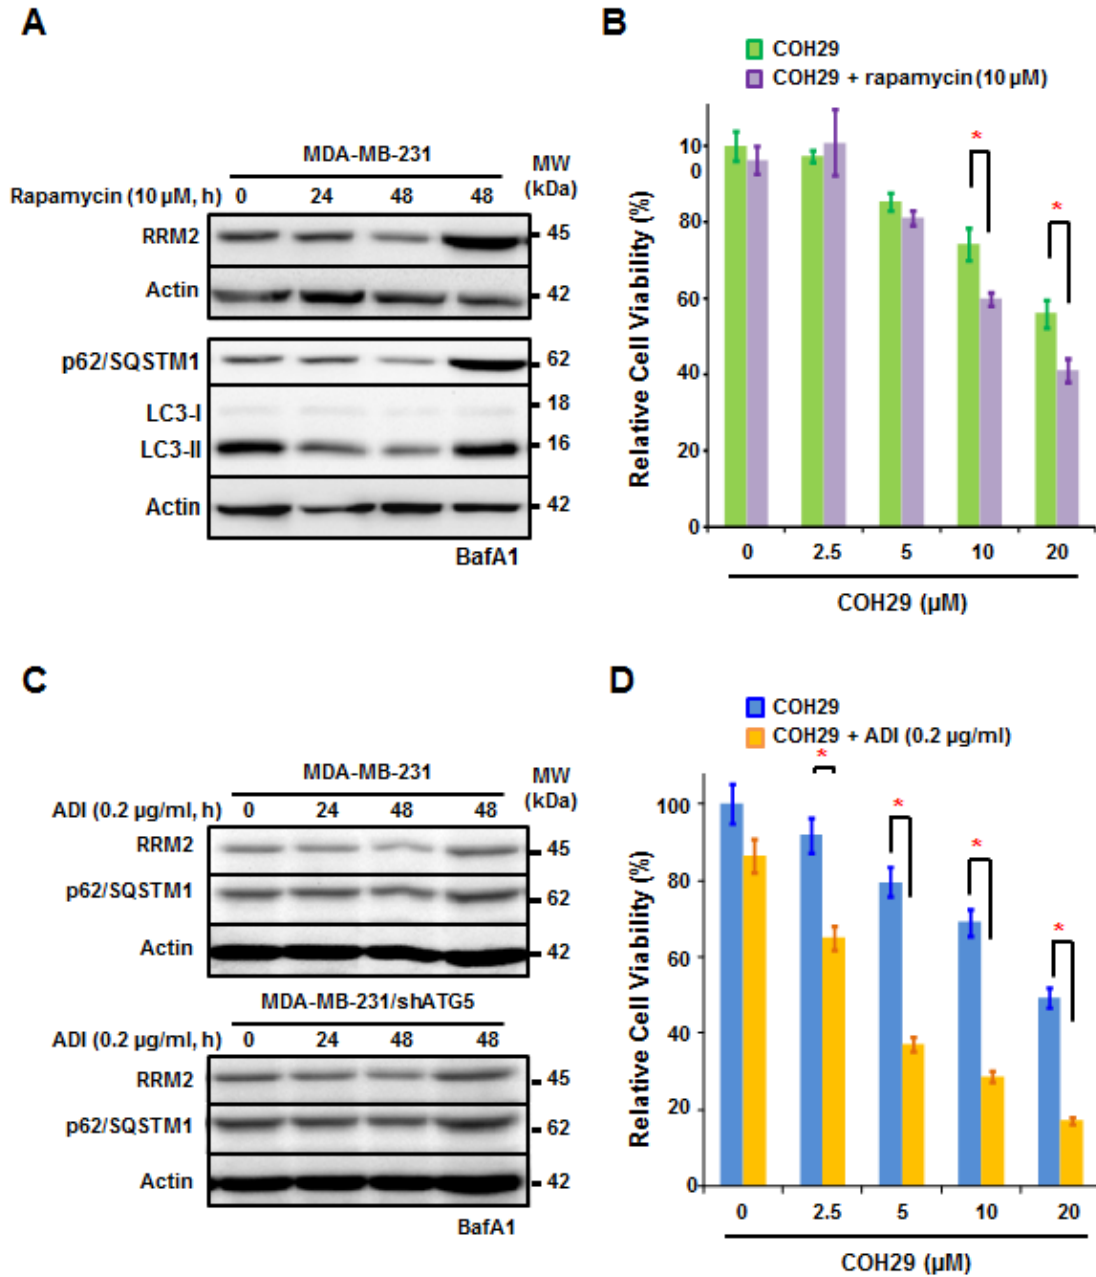

**Supplementary Figure S2:** (A, C) Western Blot analyses showing treatment of rapamycin (10  $\mu$ M) or ADI-PEG20 (ADI, 0.2  $\mu$ g/ml) induces autophagy and decreases RRM2 expression in MDA-MB-231 cells, but had no effect on MDA-MB-231/shATG5 cells. (B, D) Relative cell viability in MDA-MB-231 cells treated with the combination of rapamycin (B) or ADI-PEG20 (D) with COH29. No treatment controls are defined as 100% viable. Results are shown as means  $\pm$  SD; n = 3.

**A**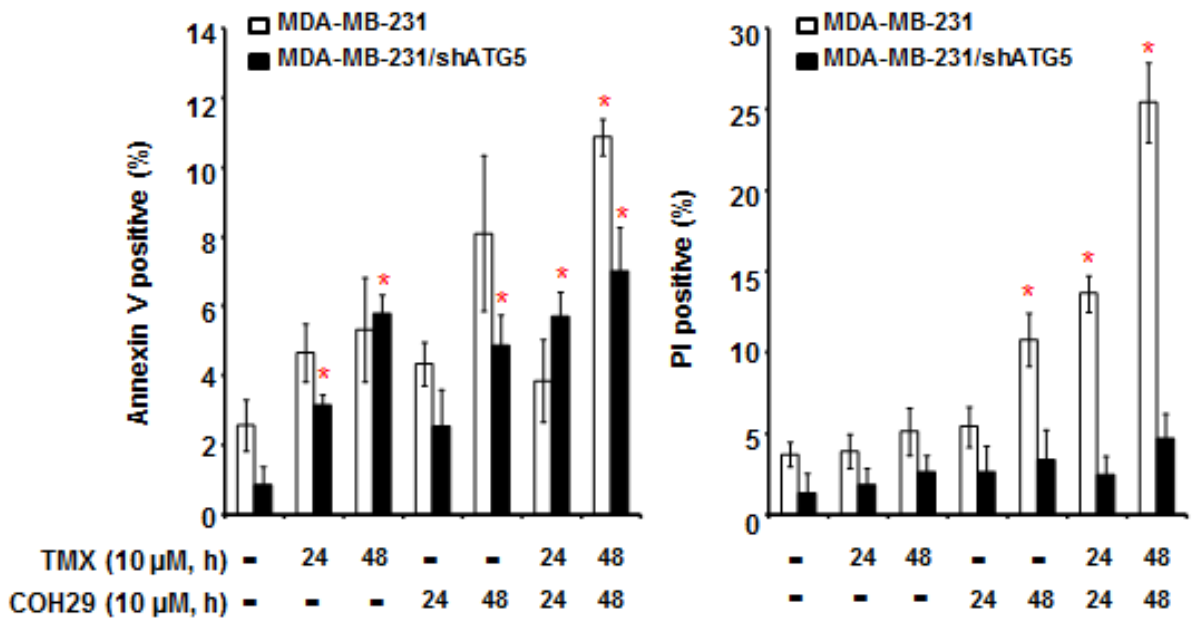**B**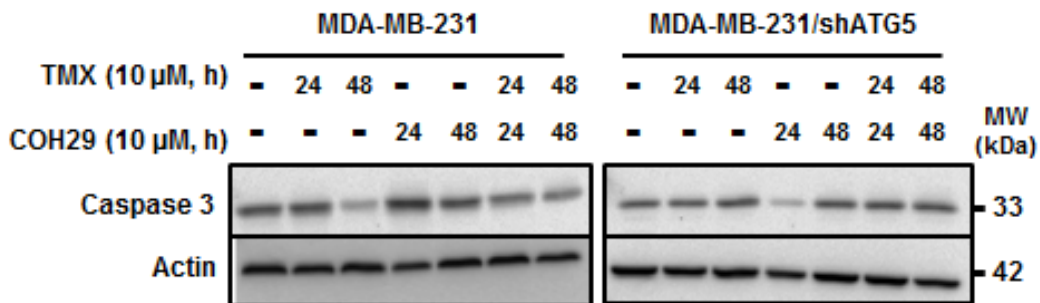

**Supplementary Figure S3:** (A) MDA-MB-231 cells and MDA-MB-231/shATG5 cells were treated with TMX, COH or combination for indicated time periods and stained with Annexin V and PI for apoptosis analysis. The positively stained population is compared to the no staining control and the percentage is plotted as a bar graph showing Annexin V on the left and PI on the right panel. Results are shown as means  $\pm$  SD; n = 3; \*, p < 0.05. (B) Western Blot analyses showing the change in caspase 3 abundance after TMX, COH and combination treatment.

**A**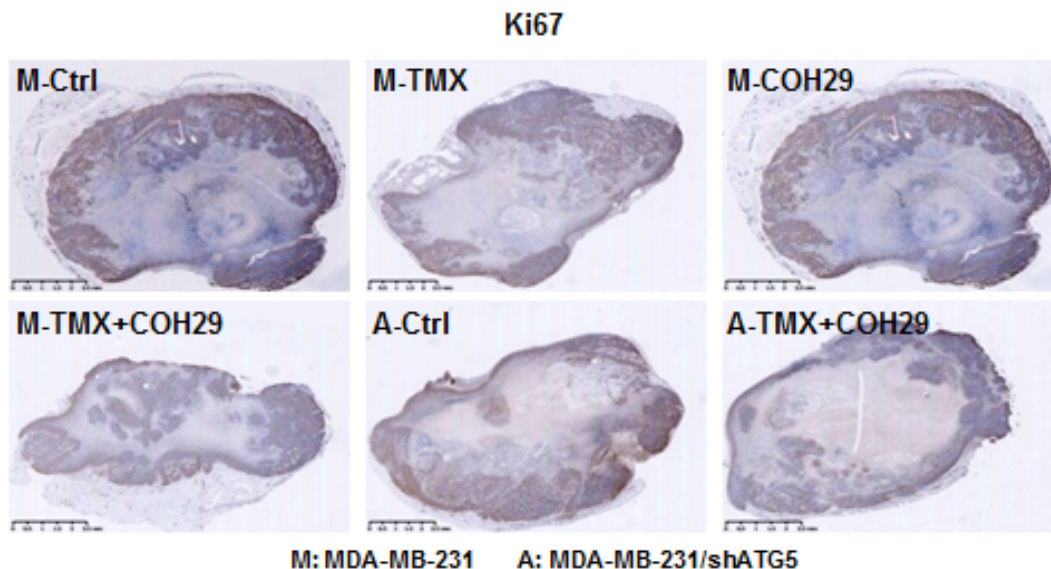**B**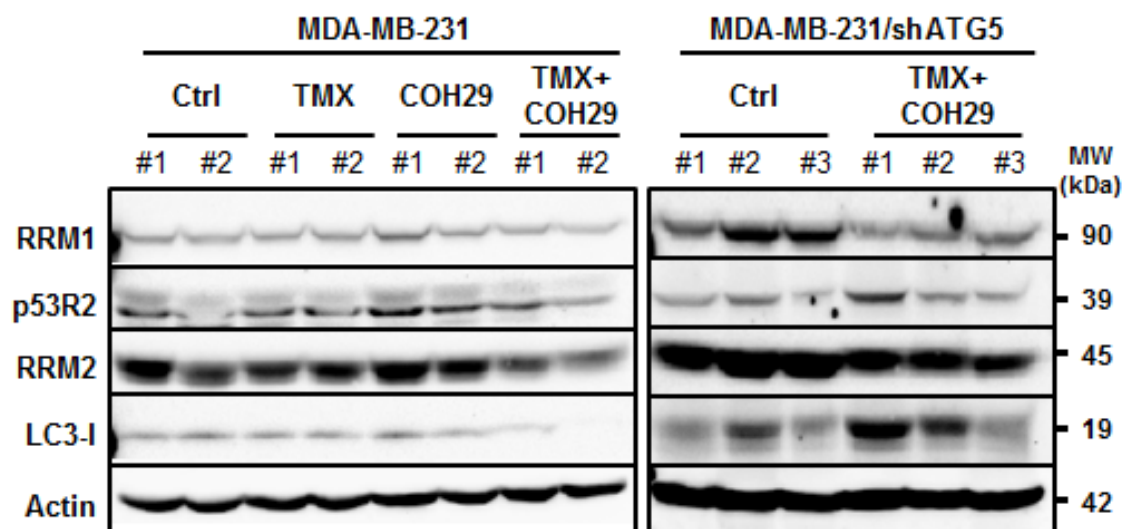

**Supplementary Figure S4:** (A) Representative tiling picture of harvested tumors after Ki67 staining. (B) Western blot analysis showing the changes in RRM1, p53R2, RRM2 and LC-3 abundance in harvested tumor samples. M: MDA-MB-231 cells; A: MDA-MB-231/shATG5 cells; Ctrl: control; T: TMX; COH: COH29.

**A**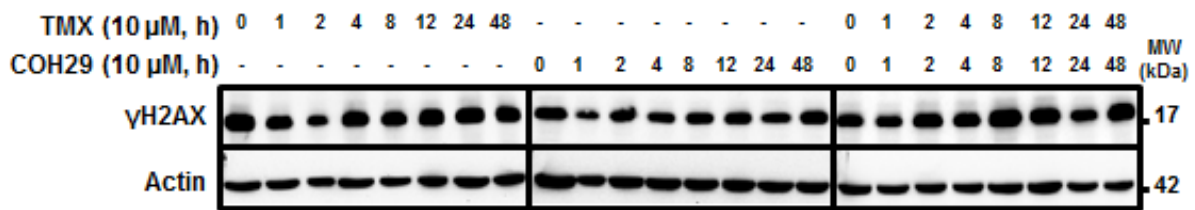**B**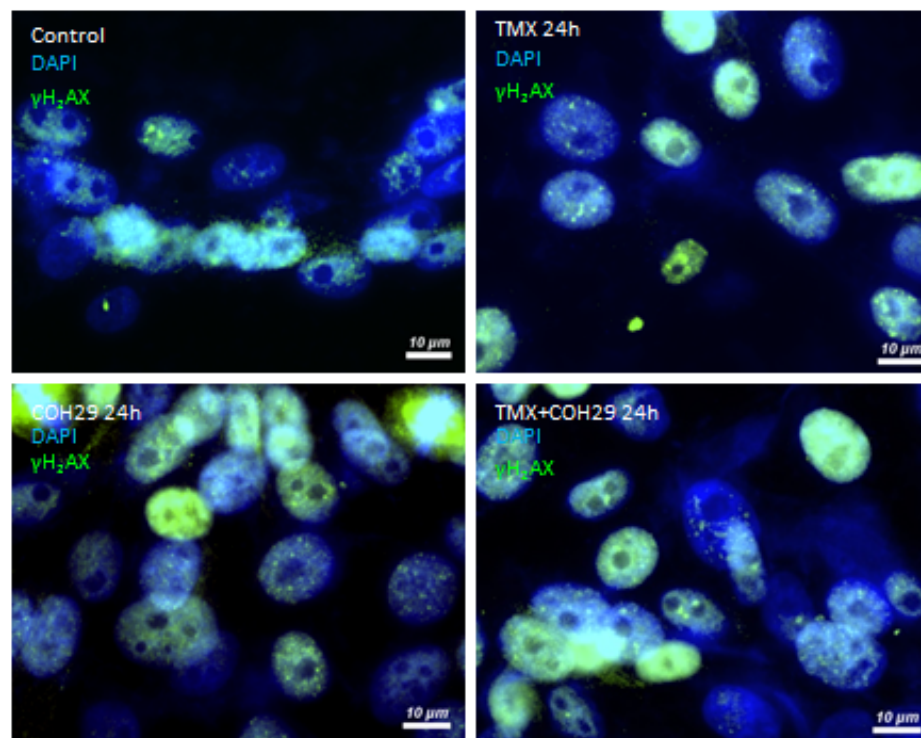

**Supplementary Figure S5:** (A) Western blot analysis showing the change in  $\gamma$ H2AX abundance in MDA-MB-231/shATG5 cells treated with TMX, COH or combination for indicated time periods. (B) MDA-MB-231/shATG5 cells were treated with TMX, COH or the combination for the indicated time periods and stained with DAPI and anti- $\gamma$ H2AX antibody. Scale bar: 10  $\mu$ m.
